# Supplementary material
Source: Springer Nature journal article supplement (https://www.springermedizin.de/resource/supplementary/12913_2013_3057_MOESM4_ESM.pdf/9532250)
Supplement: MOESM4 [file 9532250]

| Determinant                                                                                                                                          | Component of intervention                                                                                                                                                                                                                                  |
|------------------------------------------------------------------------------------------------------------------------------------------------------|------------------------------------------------------------------------------------------------------------------------------------------------------------------------------------------------------------------------------------------------------------|
| Lack of time                                                                                                                                         | Ensuring that guidelines were specific, brief, and relevant to the primary care setting<br>Creation of guideline website                                                                                                                                   |
| Poor knowledge where to find guidelines                                                                                                              | Information seminars, creation of guideline website, information on where to find other guidelines, e-mail reminders                                                                                                                                       |
| Limited access to guidelines                                                                                                                         | Creation of guideline website<br>Creation of links to the website from other parts of the intranet                                                                                                                                                         |
| Guideline characteristics: too general, take too long to read                                                                                        | Ensuring that guidelines were specific and brief                                                                                                                                                                                                           |
| Positive attitudes to EBP and guidelines ( <i>i.e.</i> , considering guidelines important, considering EBP necessary and helpful in decision making) | Stimulating positive attitudes in the seminars, <i>e.g.</i> , by emphasizing in presentation and discussions that guidelines are intended to support the PT in clinical decision making and to efficiently summarize and put evidence at their finger tips |
| Awareness of the existence of guidelines                                                                                                             | Written and oral information about relevant guidelines, creation of guideline website                                                                                                                                                                      |
| Not considering that strong evidence is lacking for most treatment methods                                                                           | Producing evidence-based guidelines with clear evidence levels; discussion points on evidence strength                                                                                                                                                     |
| Not considering that EBP creates unreasonable demands                                                                                                | Addressing benefits of and correcting misconceptions of EBP, producing guidelines that reduce the need to search and appraise evidence                                                                                                                     |
| Self-efficacy to treat according to evidence                                                                                                         | Facilitating self-efficacy by producing guidelines that are up-to-date and evidence-based                                                                                                                                                                  |
| Self-efficacy to find research                                                                                                                       | Providing information on EBP resources and providing links to them on the guideline website                                                                                                                                                                |
| Knowledge how to integrate patient preferences with guidelines                                                                                       | Providing education about the principles of EBP and the importance of integrating patient preferences                                                                                                                                                      |
| Encouragement of EBP in the workplace                                                                                                                | Providing education on the principles of EBP at the seminars                                                                                                                                                                                               |
